# Supplementary material for: A human CD137×PD-L1 bispecific antibody promotes anti-tumor immunity via context-dependent T cell costimulation and checkpoint blockade
Source: PubMed Central journal article supplement (PMC8295259; doi:10.1038/s41467-021-24767-5), 2021-07-21
Supplement: 41467_2021_24767_MOESM1_ESM.pdf [file 41467_2021_24767_MOESM1_ESM.pdf]

**A human CD137×PD-L1 bispecific antibody promotes anti-tumor immunity via context-dependent T cell costimulation and checkpoint blockade**

## **SUPPLEMENTARY INFORMATION**

**Supplementary Figures**

# Figure S1

**a**

Jurkat NFKB-luc CD137  
reporter cells

Primary human T cells

No  
stimulation

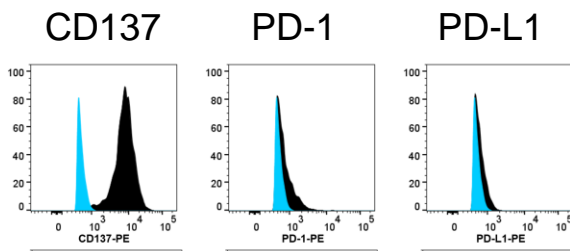

Anti-CD3  
stimulation

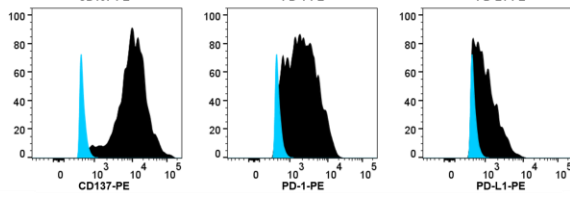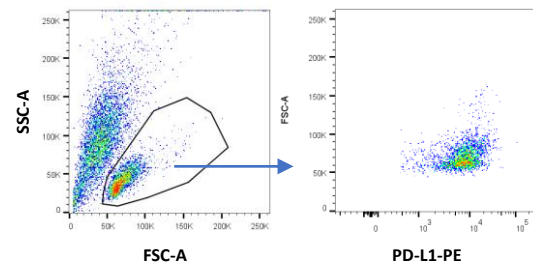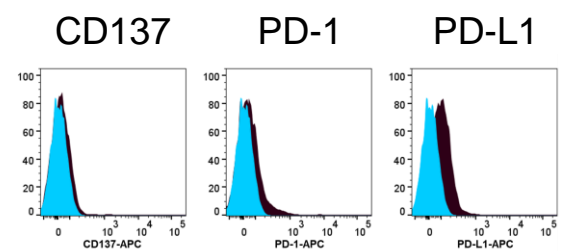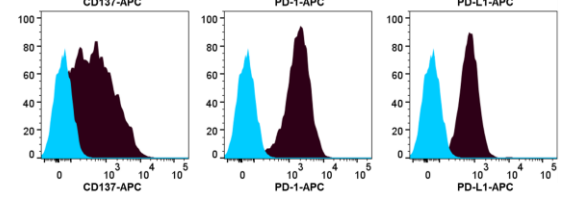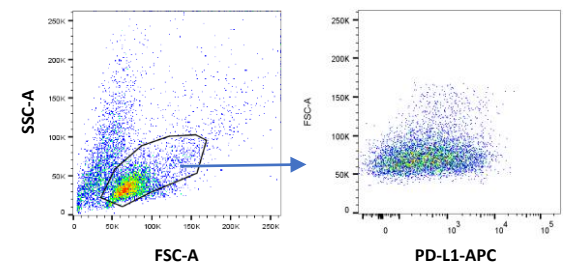

**b**

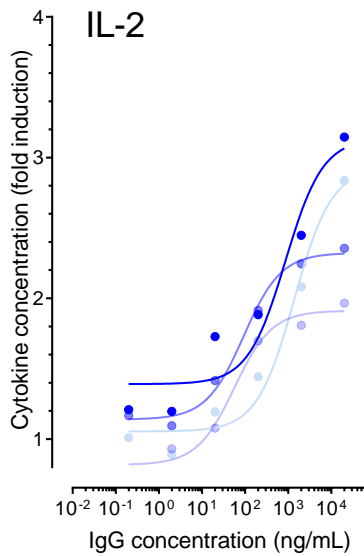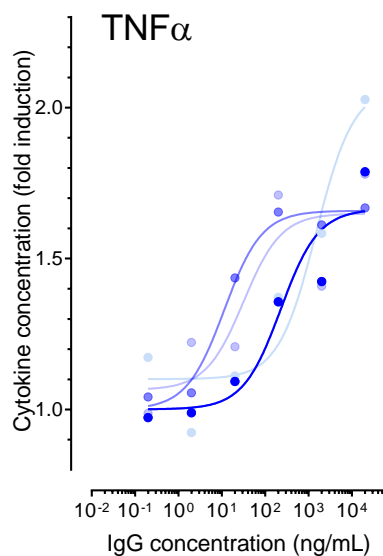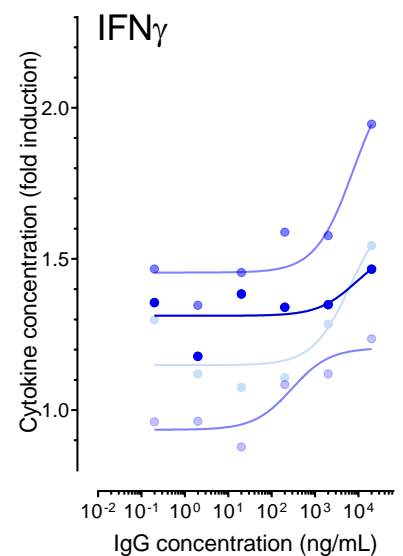

# Figure S1 cont

**c**

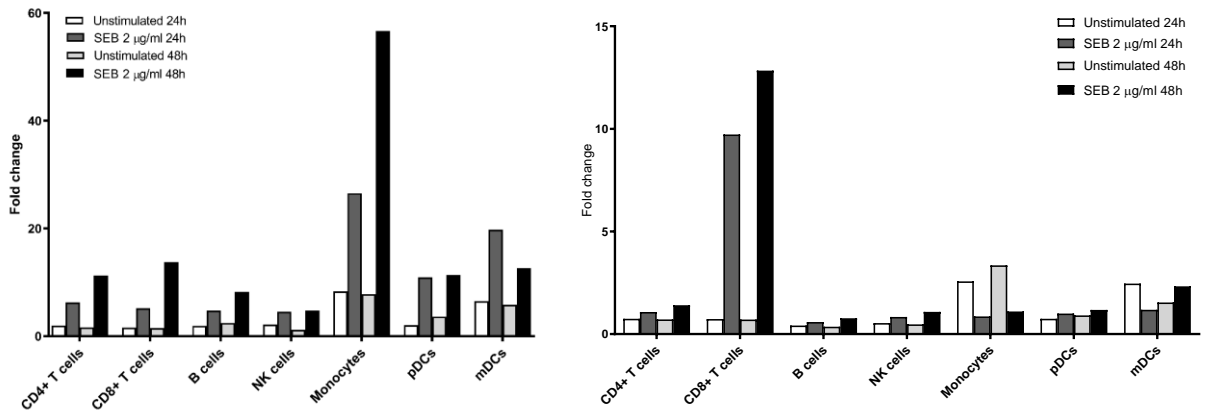

**d**

Live single cells

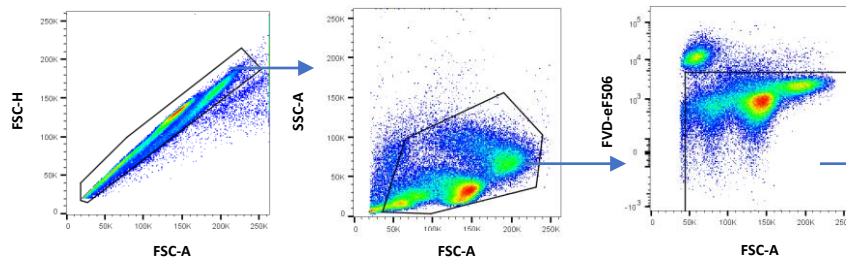

CD4+ T cells

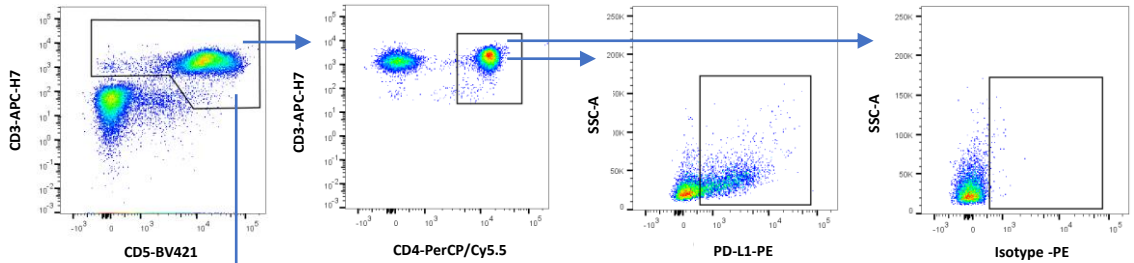

CD8+ T cells

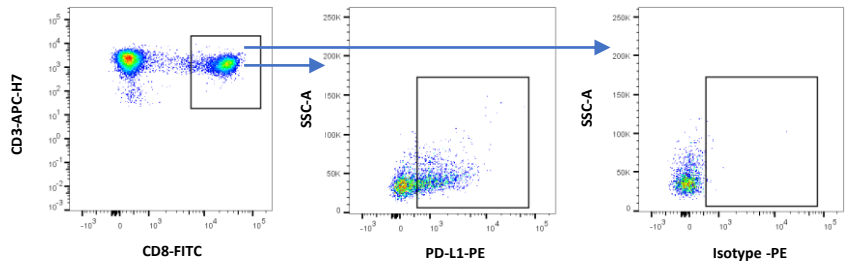

B cells

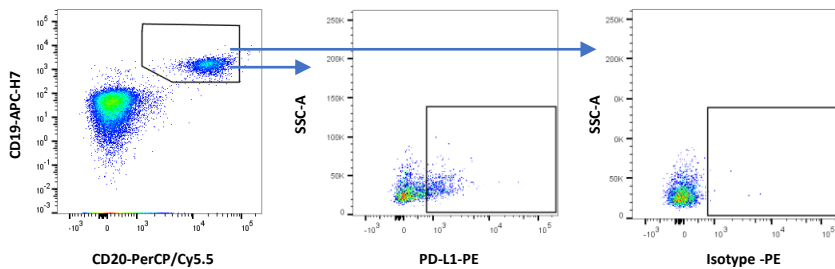

NK cells

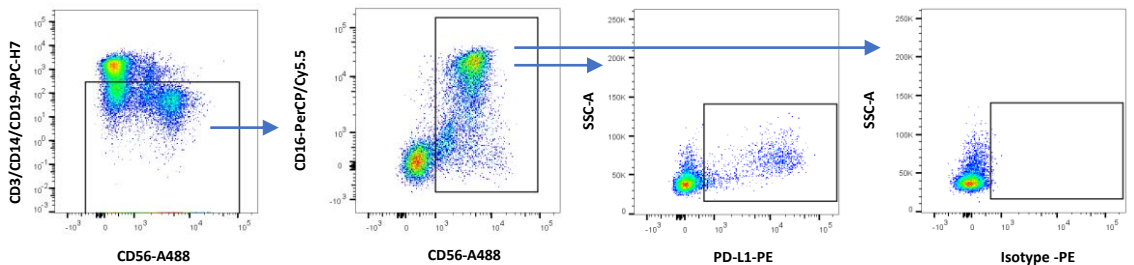

# Figure S1 cont

Monocytes

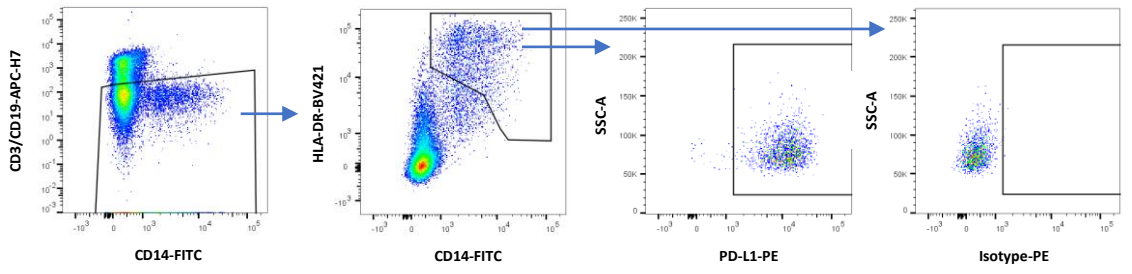

DCs

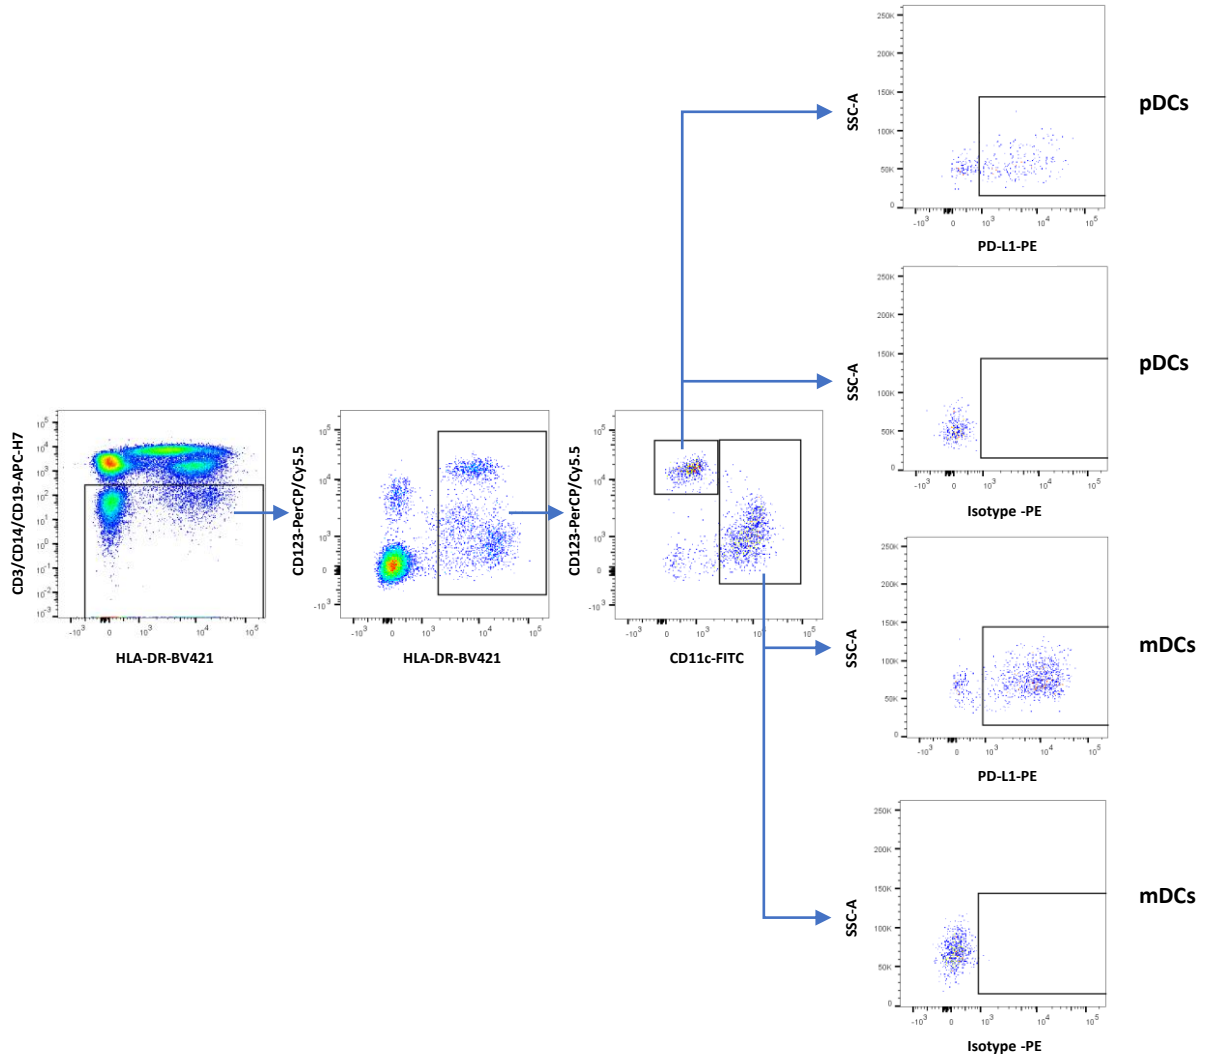

pDCs

pDCs

mDCs

mDCs

## Supplementary figure 1. Identification of MCLA-145 using unbiased functional screening

(a) *top panels* Flow cytometry histograms that show upregulation of PD-1, PD-L1 and CD137 after CD3 stimulation on Jurkat reporter (left) and primary T cells (right). CD137, PD-1 and PD-L1 staining's are shown in black, isotype control staining's in blue, *lower panels* Examples of the gating strategy used to obtain Jurkat reporter and primary T cell histograms. (b) Fold change in IL-2, TNF $\alpha$  and IFN $\gamma$  production by PBMC (n=3) stimulated with SEB in the presence of increasing concentrations of PD-L1 x CD137 bispecific antibodies (c) *top panels* Fold change in MFI of PD-L1 (Left, bar graph) and CD137 (Right, bar graph) staining after SEB stimulation of immune cells within the PBMC population as determined by flow cytometry. (d) Example of the flow cytometry gating strategy of SEB-stimulated PBMC to determine PD-L1 expression levels within the PBMC population.

Figure S2

**a**

CHO-CD137

CHO-PD-L1

Activated T cells

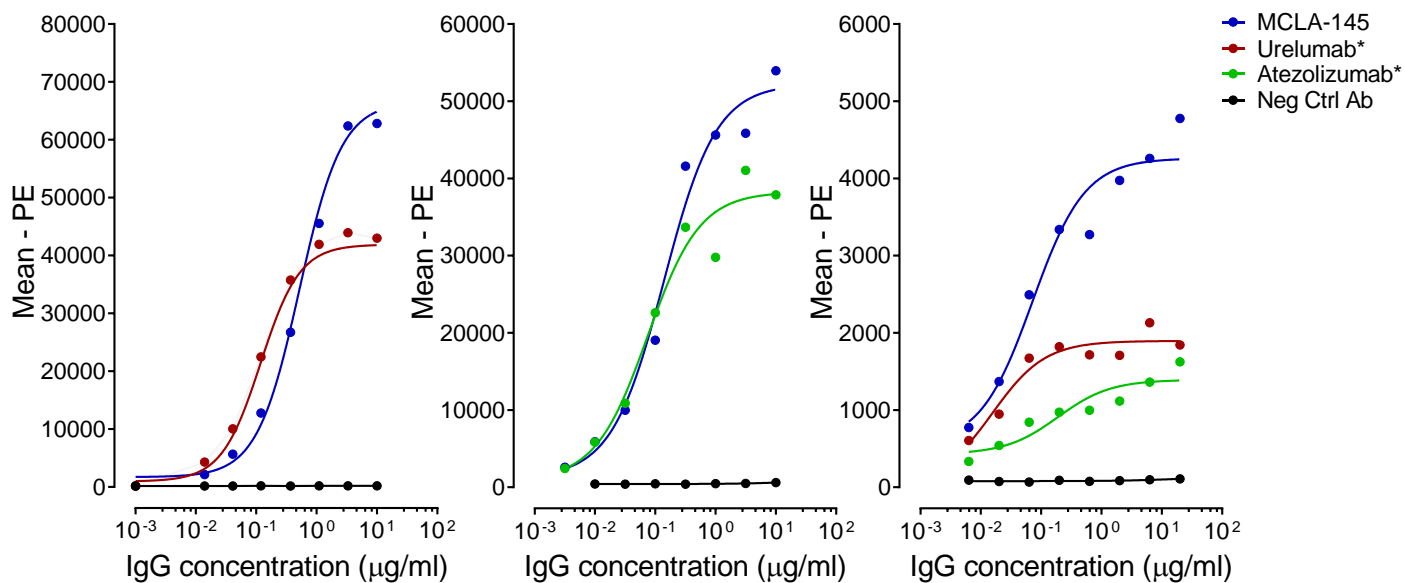

**b**

MCLA-145

Neg. Ctrl Ab

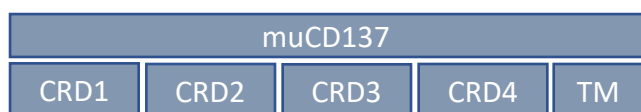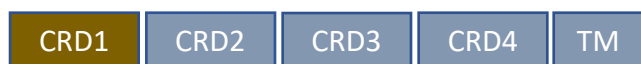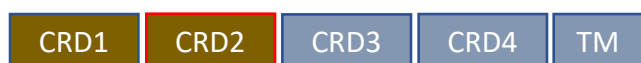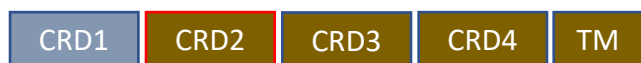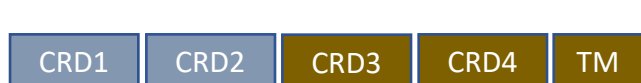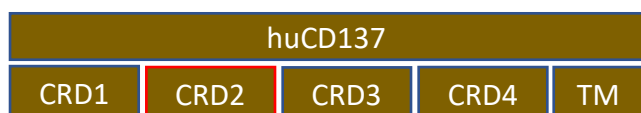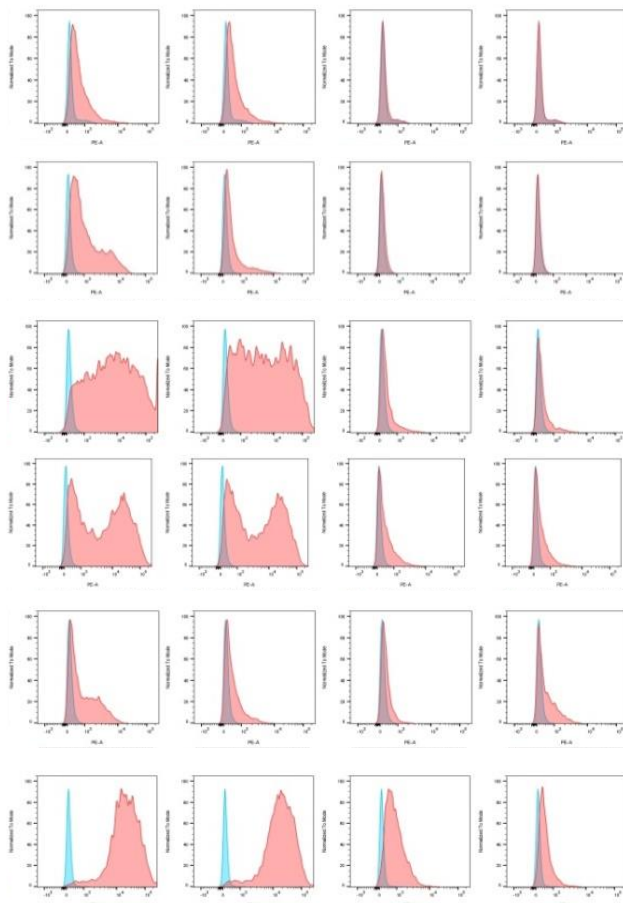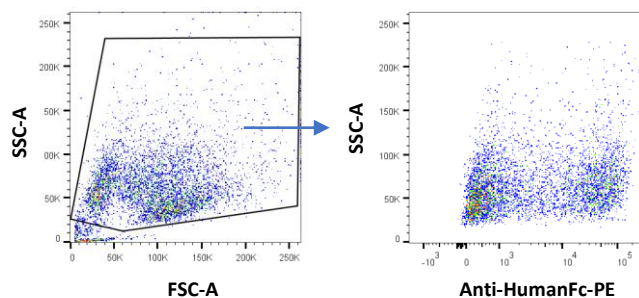

Anti-HumanFc-PE

C

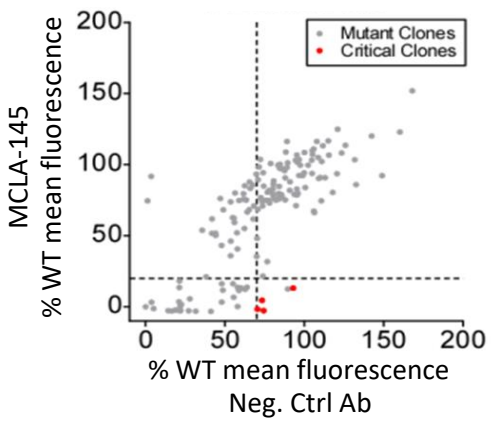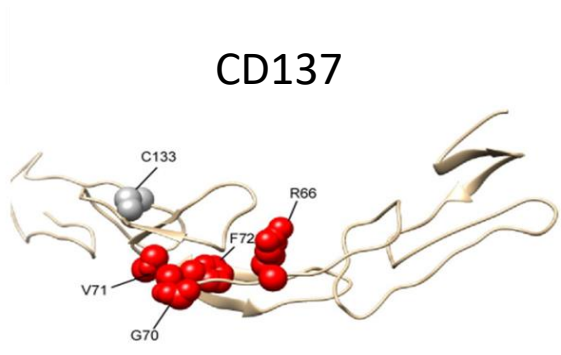

Supplementary figure 2. MCLA-145 exhibits high affinity for its targets and binds a distinct epitope on CD137

(a) Binding of MCLA-145 to CHO cells overexpressing CD137 (left), CHO-PD-L1 cells (middle) or activated T cells that express both receptors (right) as determined by flow cytometry; (b) *top left panel* schematic figure showing location of human and murine domains in chimeric CD137 expression constructs, *top right panel* Histograms showing MCLA-145 binding to HEK293 cells transfected with chimeric expression constructs, *lower panels* Example of flow cytometry gating strategy of HEK293 transfected cells; (c) *left panel* binding of MCLA-145 (y-axis) vs control CD137 mAb (x-axis) to members of a mutagenesis library of CD137, *right panel* location of residues critical for MCLA-145 binding shown in red on a ribbon structure of human CD137 6MGP.pdb.



Figure S3

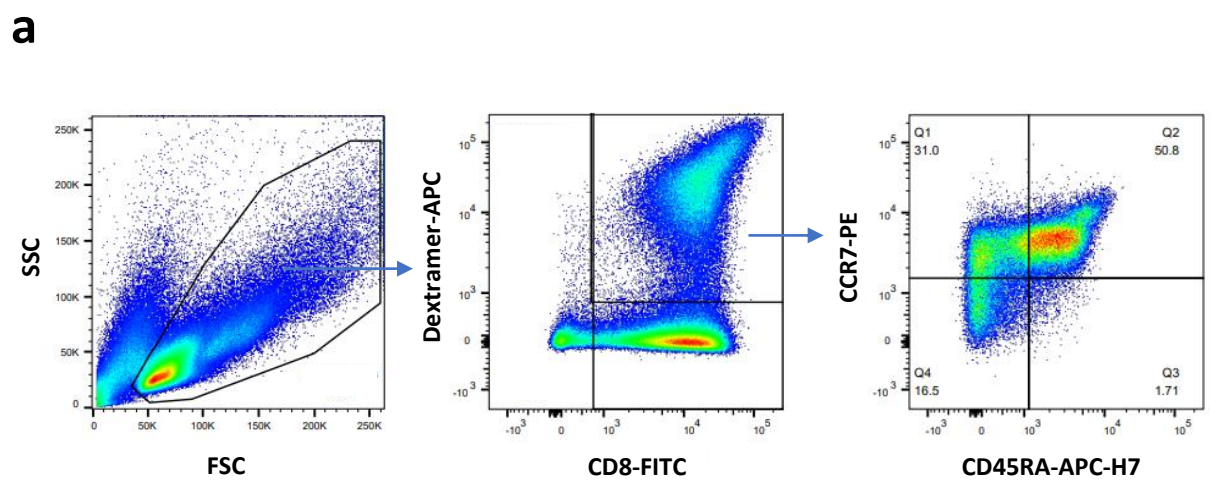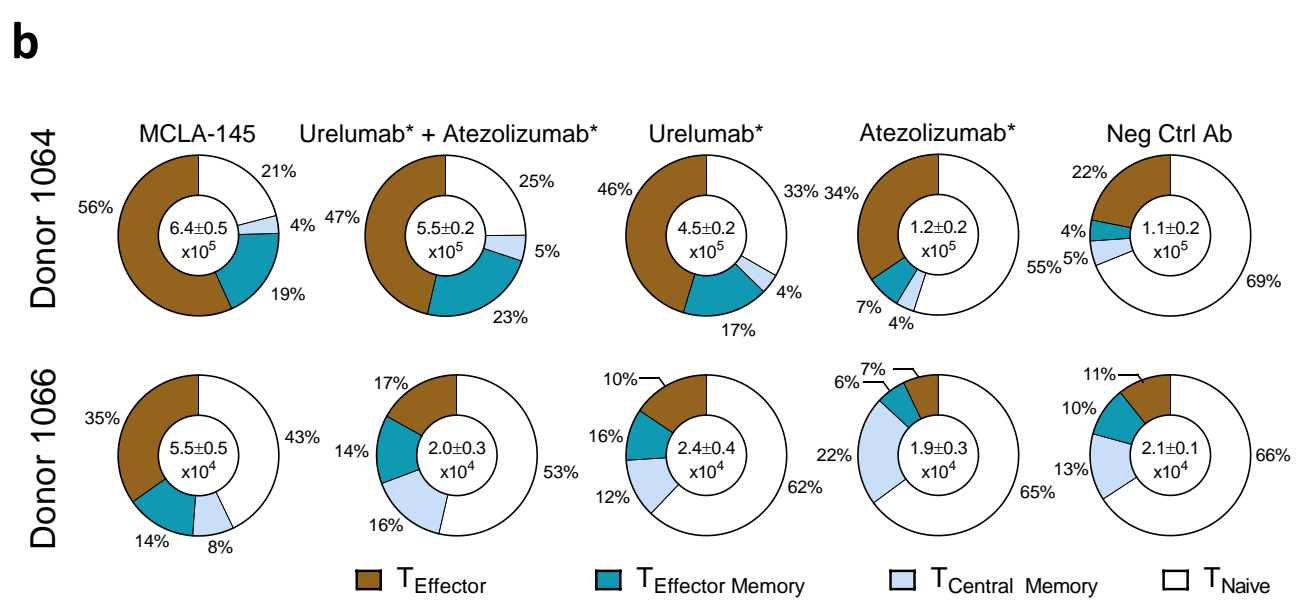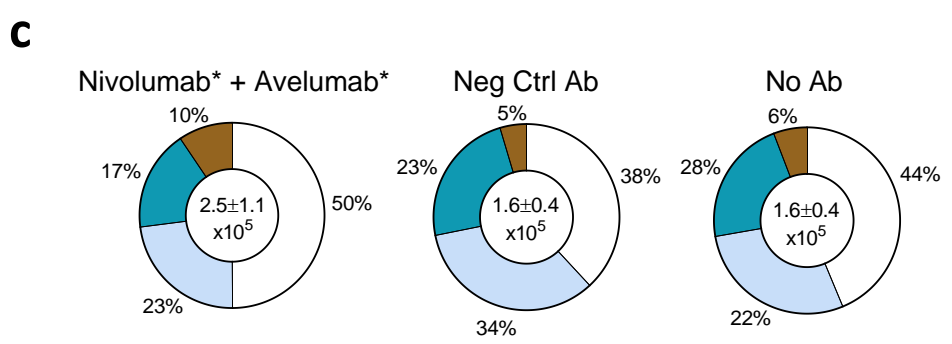

Supplementary figure 3. MCLA-145 potently activates T cells, promotes immunological memory and overcomes immunosuppression

Effect of PD-1 and PD-L1 antibodies on naïve CD8<sup>+</sup> T cell priming. (a) Example (data from Figure 3a, main text and S3b and S3c) of day 10 of DC/T cell co-culture flow cytometry gating strategy to determine T naïve/memory stem cell (CD45RA<sup>+</sup>CCR7<sup>+</sup>), central memory T cell (CD45RA<sup>-</sup>CCR7<sup>+</sup>), effector memory T cell (CD45RA<sup>-</sup>CCR7<sup>-</sup>) and terminally differentiated effector T cell (CD45RA<sup>+</sup>CCR7<sup>-</sup>) frequency within the dextramer<sup>+</sup> antigen-specific CD8<sup>+</sup> T cell population; (b) Relative proportion of T cell subsets in colored segments and the absolute amount of CD8<sup>+</sup>dextramer<sup>+</sup> antigen-specific T cells in the center of the donut from two donors on day 10 of DC/T cell co-culture after treatment with MCLA-145 or control antibodies as determined by flow cytometry; (c) Donut charts as described in (a) after treatment with combination of nivolumab\* and avelumab\* or control antibodies, average of two donors.

Figure S4

a

|                | PDL1 Percentages |       |
|----------------|------------------|-------|
|                | CD45+            | CD45- |
| <b>Tumor 1</b> | 1.52             | 0.8   |
| <b>Tumor 2</b> | 0.19             | 0.39  |
| <b>Tumor 3</b> | 1.78             | 1.89  |
| <b>Tumor 4</b> | 2.13             | 0.46  |
| <b>Tumor 5</b> | 3.01             | 1.01  |

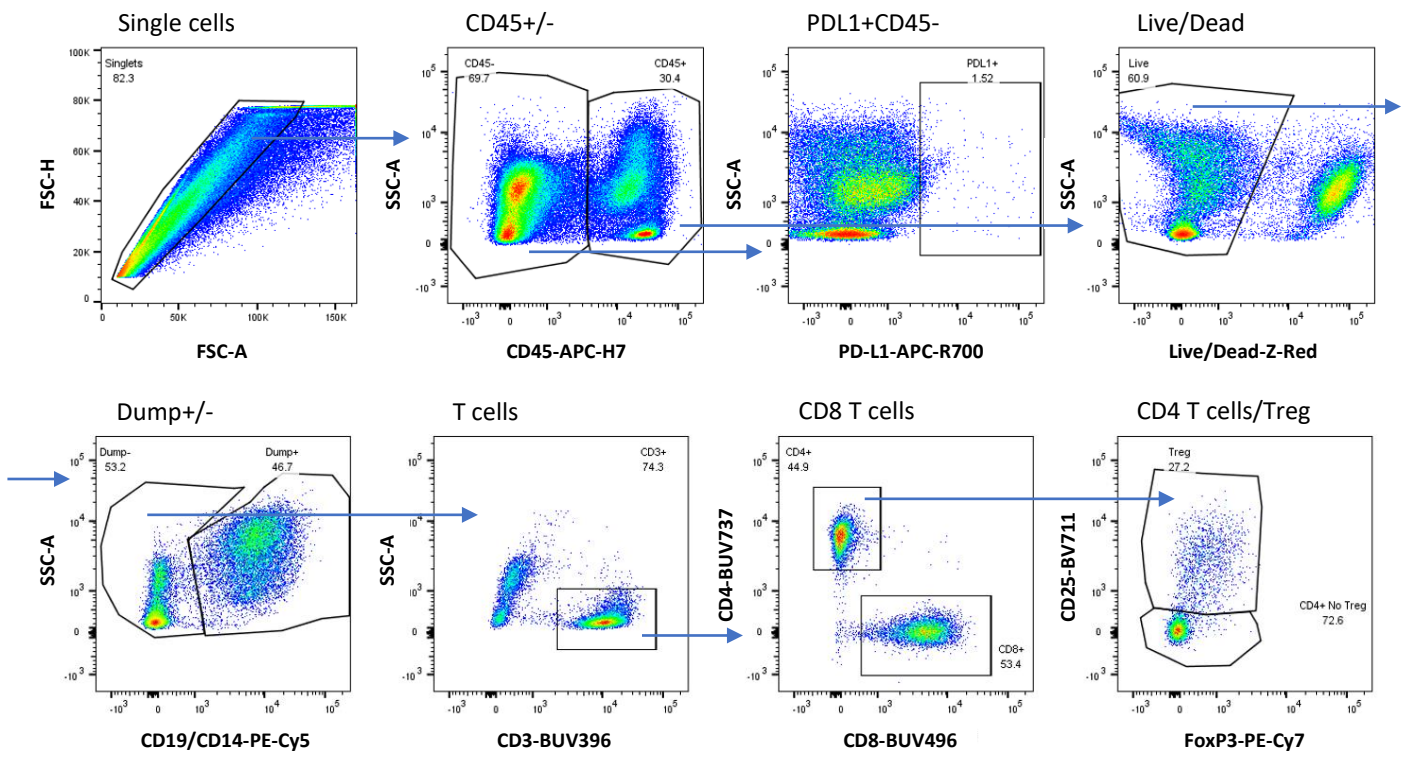

b

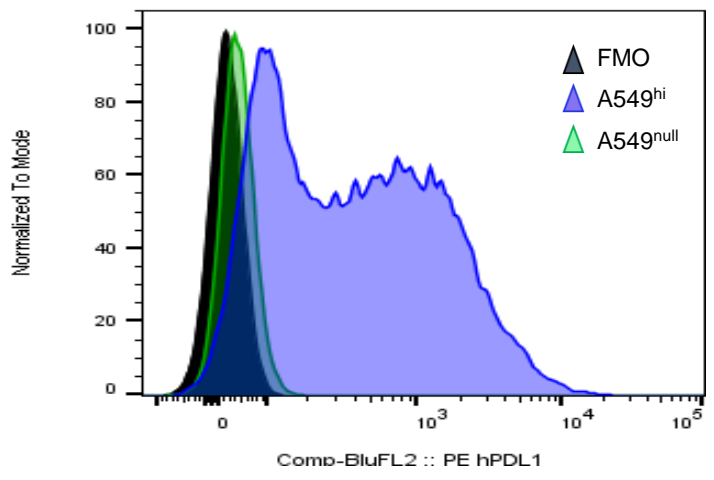

Figure S4 (cont)

c

TILS Gating strategy

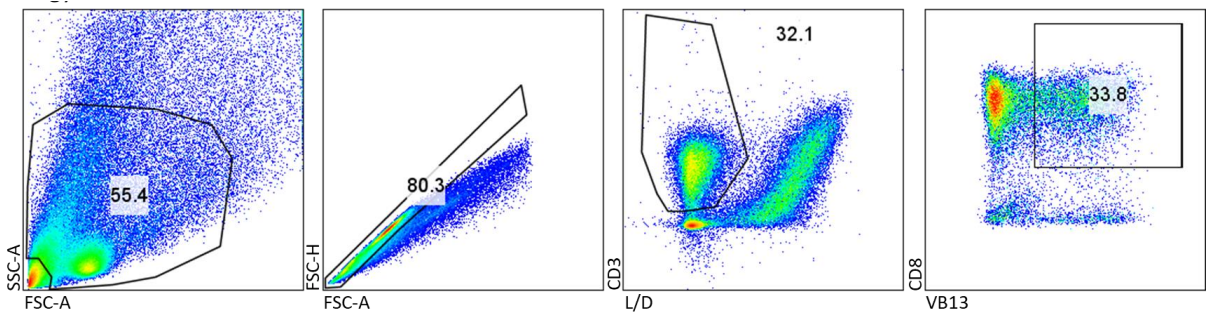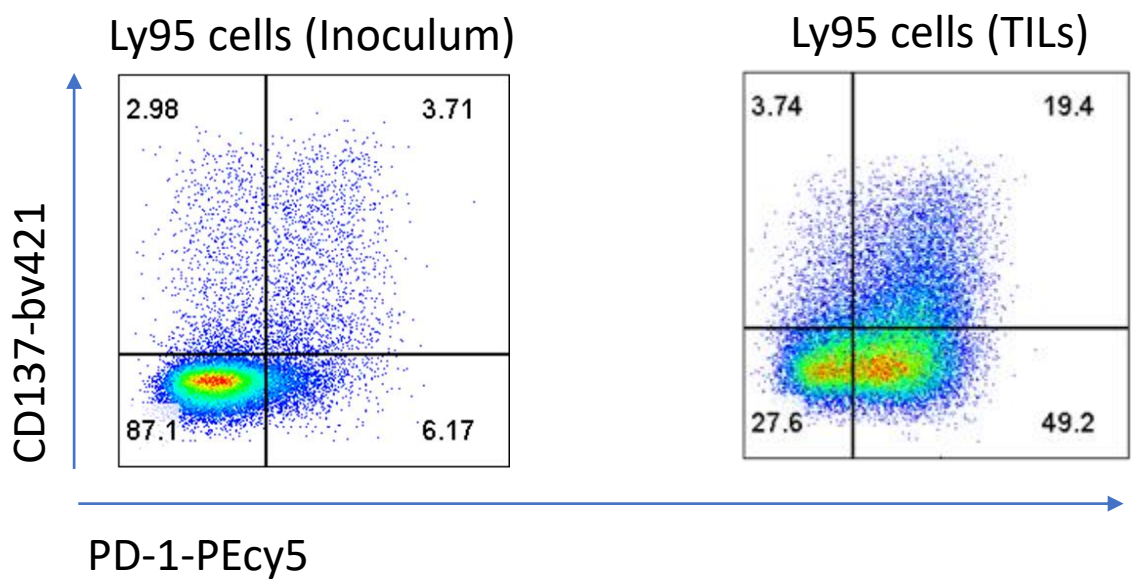

d

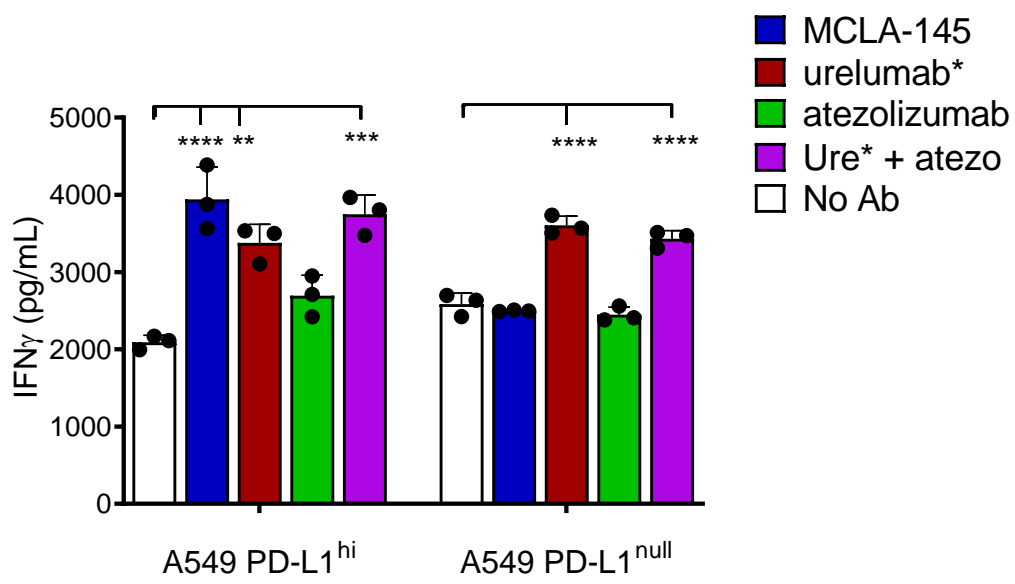

Figure S4 (cont)

e

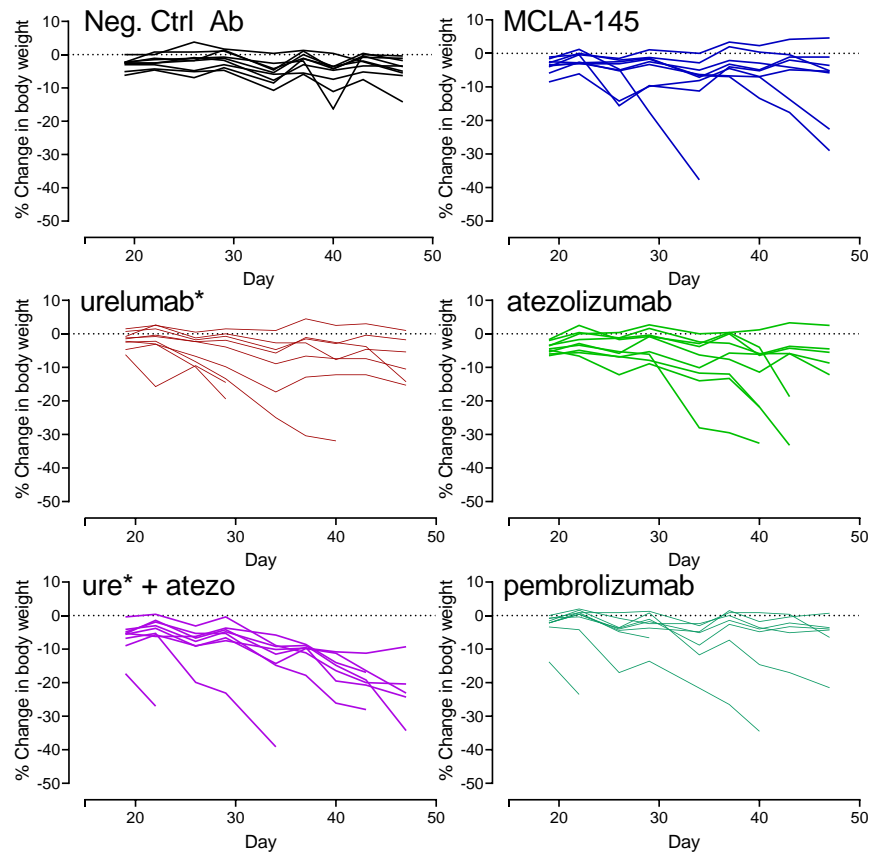

f

| Compare column means (main column effect) |            |                    |              |         |                  |
|-------------------------------------------|------------|--------------------|--------------|---------|------------------|
| Number of families                        | 1          |                    |              |         |                  |
| Number of comparisons per family          | 21         |                    |              |         |                  |
| Alpha                                     | 0.05       |                    |              |         |                  |
| Bonferroni's multiple comparisons test    | Mean Diff. | 95.00% CI of diff. | Significant? | Summary | Adjusted P Value |
| Neg. Ctrl. Ab vs. atezolizumab            | 3.26       | 0.2306 to 6.289    | Yes          | *       | 0.0236           |
| Neg. Ctrl. Ab vs. urelumab*               | 2.444      | -0.5937 to 5.482   | No           | ns      | 0.2871           |
| Neg. Ctrl. Ab vs. ure* + atezo            | 8.322      | 4.957 to 11.69     | Yes          | ****    | <0.0001          |
| Neg. Ctrl. Ab vs. MCLA-145                | 2.062      | -0.6204 to 4.744   | No           | ns      | 0.3888           |
| Neg. Ctrl. Ab vs. pembrolizumab           | 1.843      | -1.220 to 4.906    | No           | ns      | >0.9999          |
| MCLA-145 vs. atezolizumab                 | -1.198     | -4.857 to 2.461    | No           | ns      | >0.9999          |
| MCLA-145 vs. urelumab*                    | -0.3826    | -4.047 to 3.282    | No           | ns      | >0.9999          |
| MCLA-145 vs. ure* + atezo                 | -6.261     | -10.20 to -2.326   | Yes          | ****    | <0.0001          |
| MCLA-145 vs. pembrolizumab                | -0.2187    | -3.903 to 3.465    | No           | ns      | >0.9999          |

g

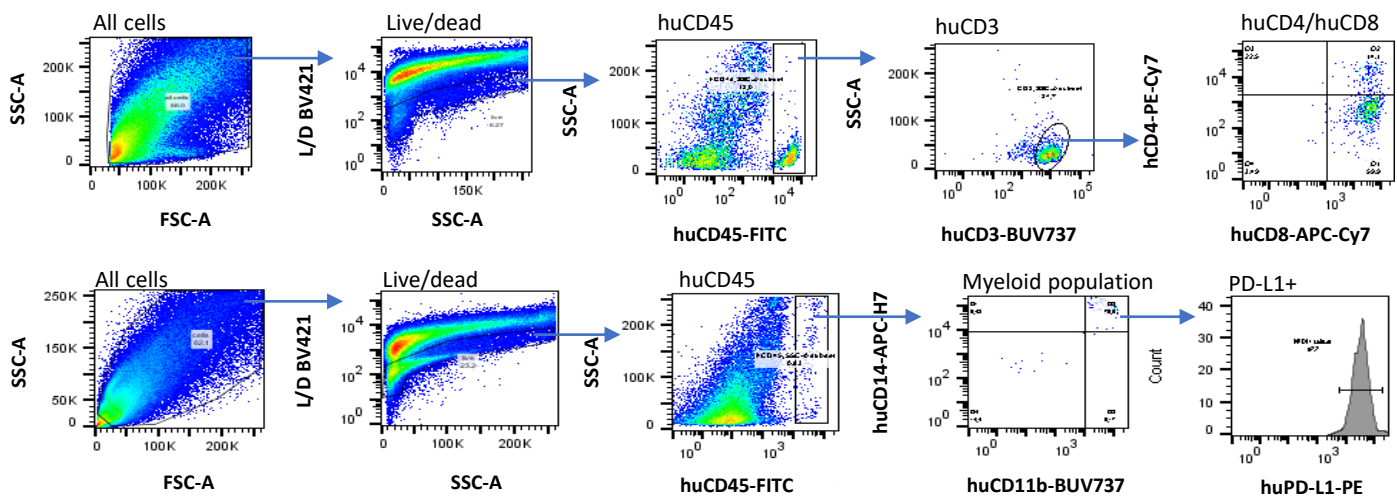

Supplementary figure 4. MCLA-145 recruits and activates T cells *ex vivo* and *in vivo* to enhance antitumor immunity

(a) *table* Percentage of PD-L1 positive cells in primary endometrial tumor explants as determined by flow analysis, *pseudocolor plots* example of gating strategy for flow cytometry to determine frequencies of endometrial tumor CD45<sup>-</sup> and CD45<sup>+</sup> cells expressing PD-L1 and (data from Figure 4a, main text) T cell and T cell subset frequencies; (b) Flow analysis of PD-L1 expression of A549-PD-L1<sup>hi</sup> and A549-PD-L1<sup>null</sup> cells; (c) flow analysis of PD-1 and CD137 expression on Ly95 cells before inoculation and within tumor isolates (gating strategy for TIL isolates is illustrated); (d) Effect of MCLA-145 or reference antibodies on levels of IFN $\gamma$  detected in supernatant of *in vitro* co-cultures of A549-PD-L1<sup>hi</sup> or A549-PD-L1<sup>null</sup> tumor cells and NY-ESO-1-specific T cells. Error bars represent SEM (n=6 independent experiments), \*\*\*\* p<0.0001 as determined by two-way ANOVA and Sidak's test; (e) The percentage weight change in individual human CD34<sup>+</sup> engrafted NSG mice following subcutaneous inoculation with MDA-MB-231 cells and the indicated treatments (n=9 mice per group); (f) Table showing the results of a Bonferroni's multiple comparisons test after a two-way Anova. (g) Example (data from Figure 4G, main text) of MDA-MB-231 tumor flow cytometry gating strategy to determine percentages of CD4<sup>+</sup> and CD8<sup>+</sup> T cells and PD-L1 expressing monocytes within the human CD45<sup>+</sup> cell population.

Figure S5

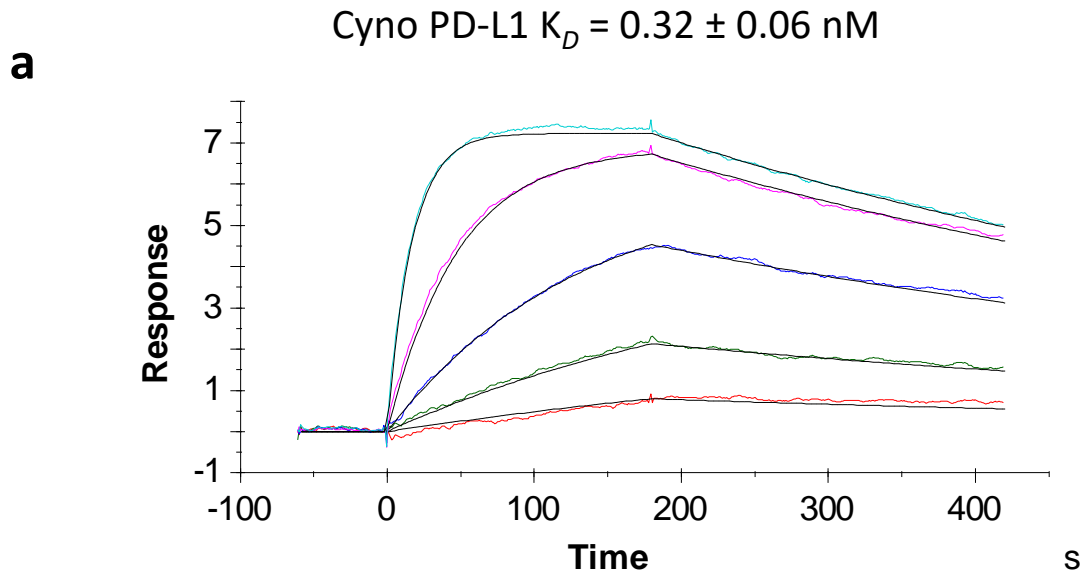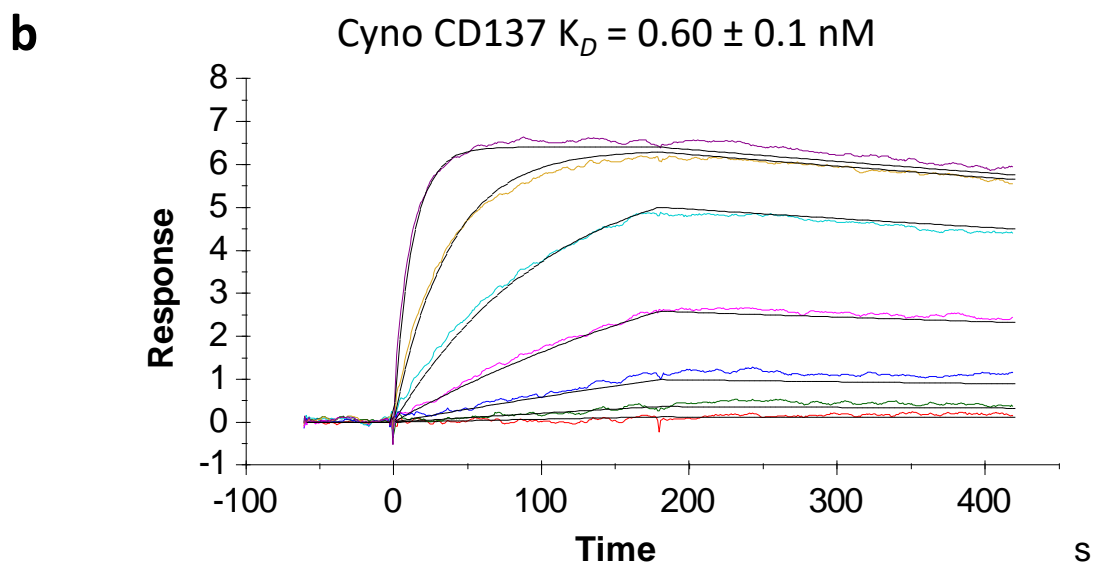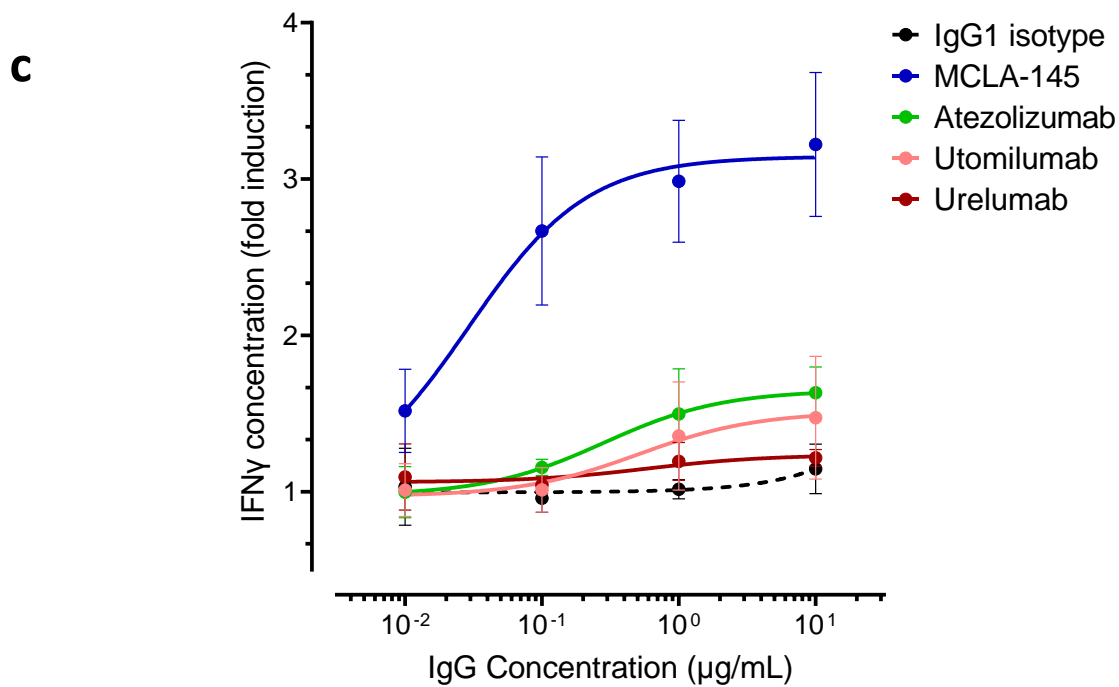



Figure S5 (cont)

d

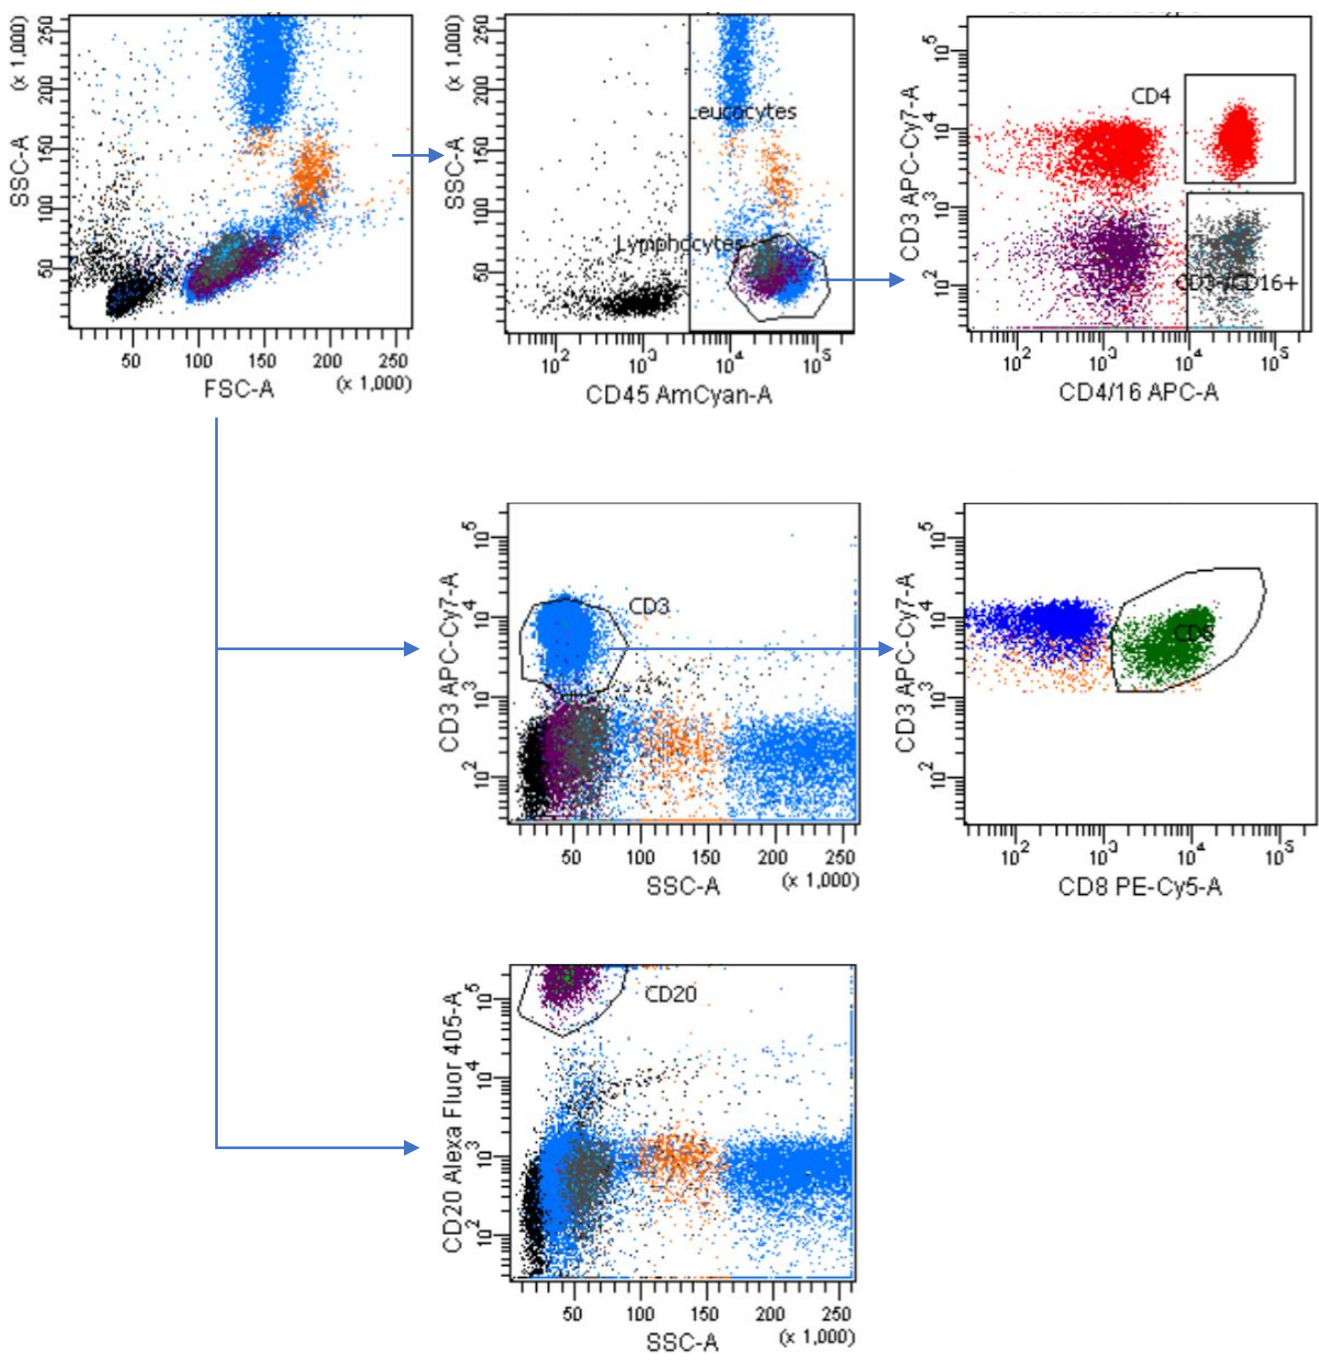



Supplementary figure 5. MCLA-145 is well tolerated in non-human primates at high doses

SPR Sensorgrams of cynomolgus PD-L1 (a) or cynomolgus CD137 (b) binding to MCLA-145, data are globally fitted to a 1 to 1 binding kinetics model with the calculated  $K_D$  indicated; (c) IFN $\gamma$  production by cynomolgus monkey whole blood stimulated with SEB in the presence of various concentration of MCLA-145 (blue line), atezolizumab\* (green line), urelumab (orange line), utomilumab\* (red line), IgG1 isotype (black dashed line), or IgG4 isotype (gray dashed line) for 72 hours. Data represent the average fold change induction compared to blood stimulated in the absence of antibody (n = 4, error bars are mean  $\pm$  SD statistical analysis was performed by ordinary one-way Anova and Dunnett's test, p < 0.0001 for Neg. Ctrl vs MCLA-145); (d) Example (data from Figure 5f, main text) of the gating strategy for flow cytometry to determine blood T (CD3+), CD4 T (CD45+, lymphocytes, CD3+/CD4+), CD8 (CD3+/CD8+), B (CD20+) and NK (CD45+, lymphocytes, CD3-/CD16+) cells.

Figure S6

**a**

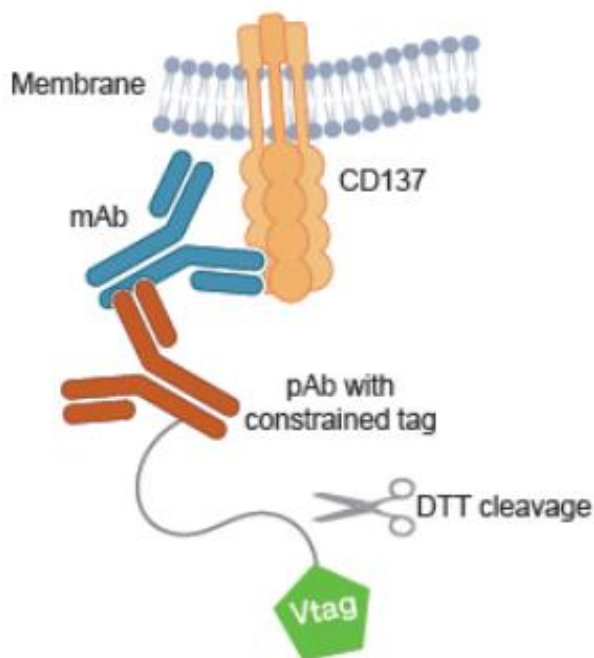

**b** CD137 Expression

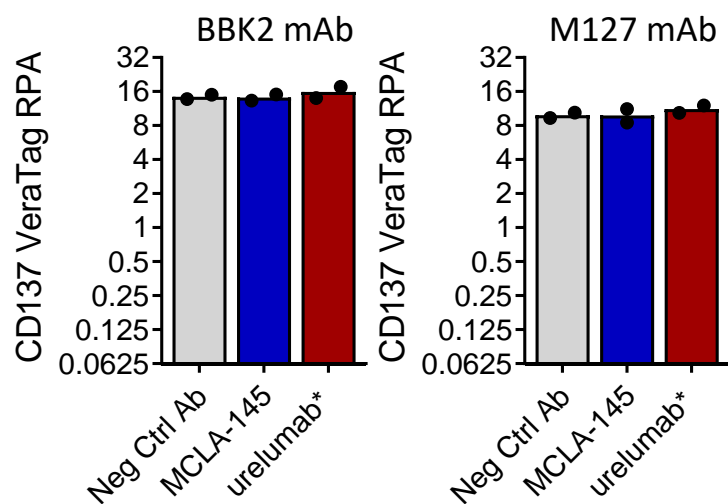

**c** PD-L1 Expression

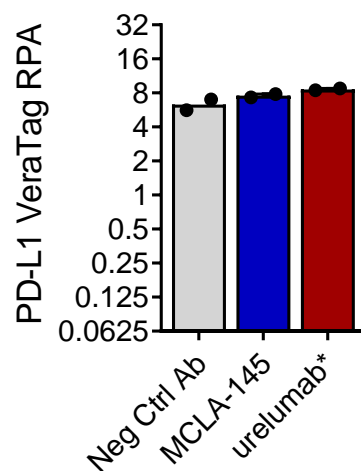

**d**

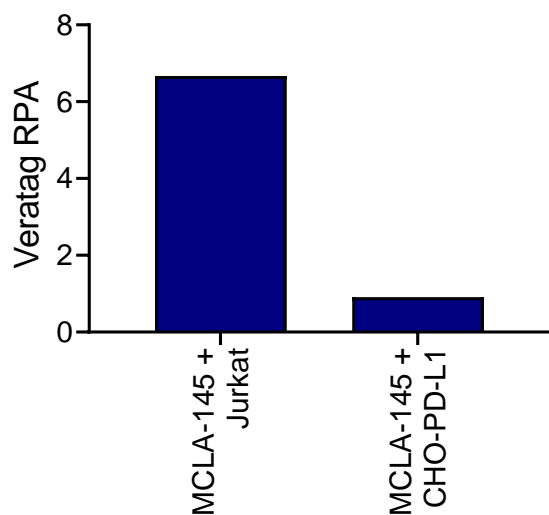

**e**

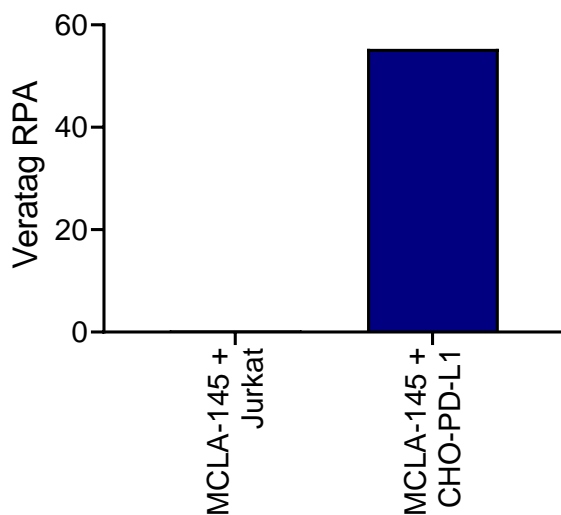

Figure S6 (cont)

f

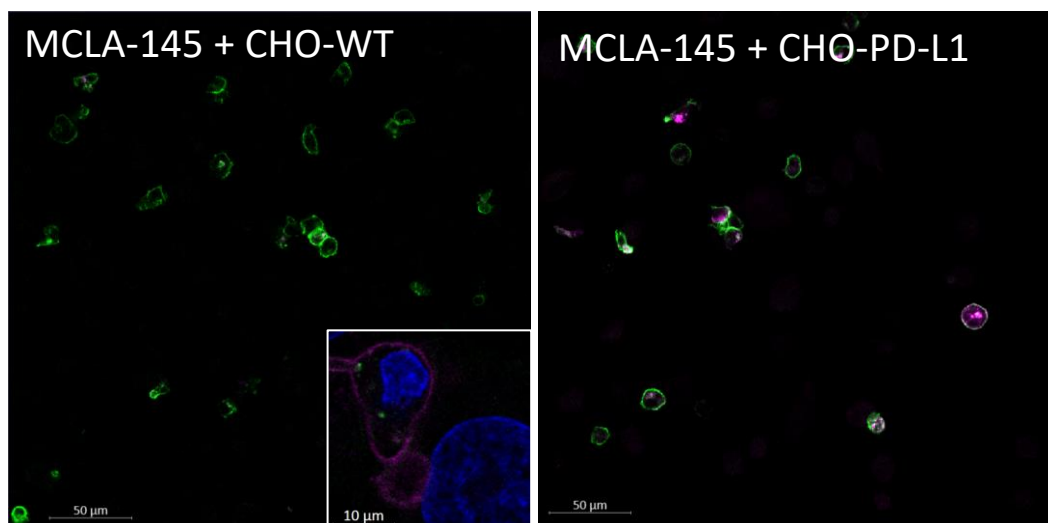

g

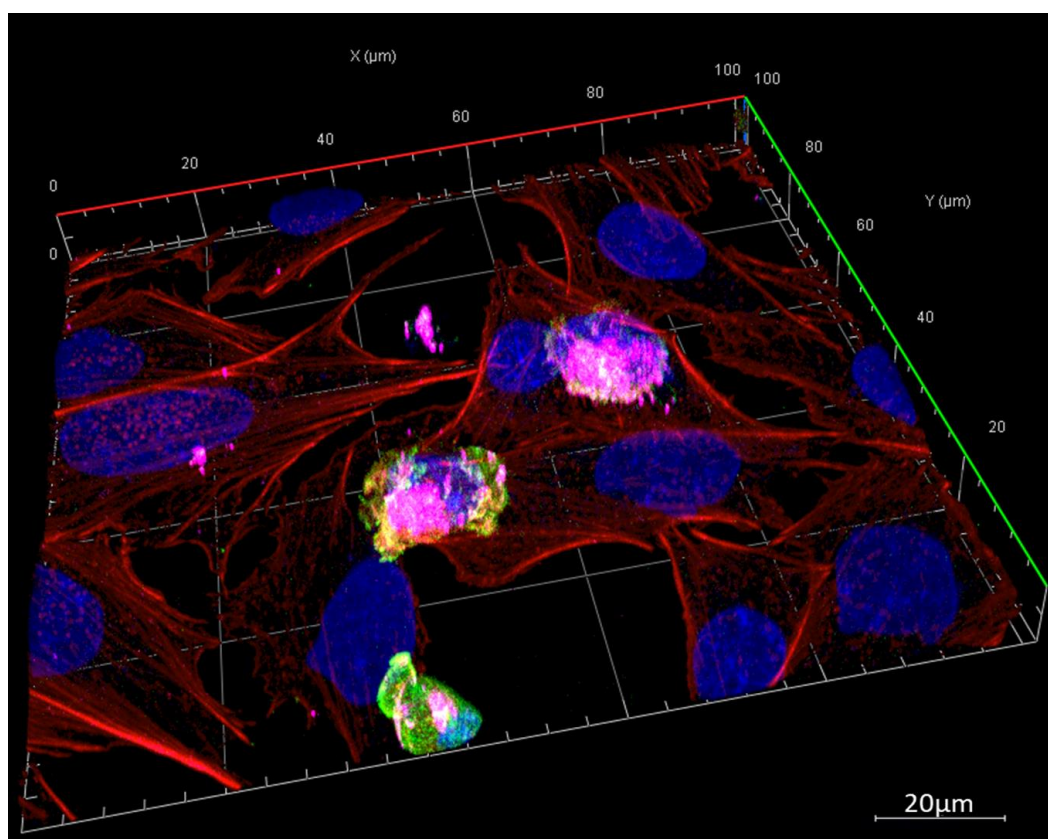

h

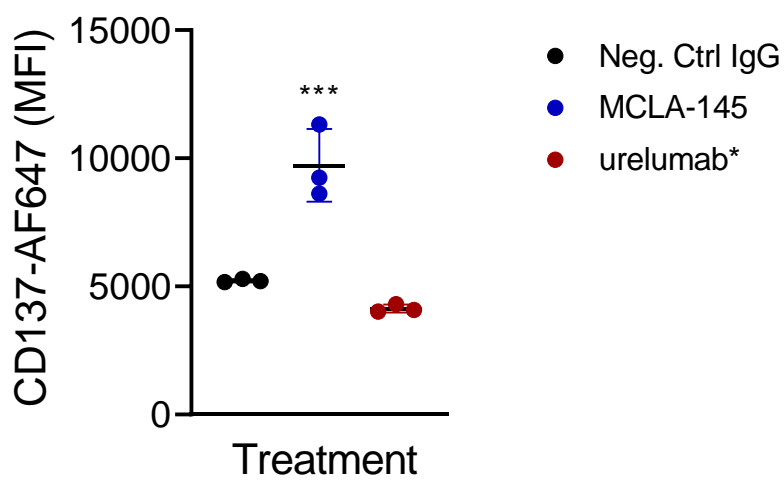

Supplementary figure 6. MCLA-145 transactivates CD137 in a PD-L1 dependent manner via receptor clustering

(a) Schematic of Vera Tag assay setup to detect expression; expression of CD137 using two different antibodies BBK2 and M127 (b), or PD-L1 (c) in co-cultures treated with MCLA-145 or control antibodies; expression of CD137 (d) or PD-L1 (e) in single cultures treated with MCLA-145; confocal images of CD137 receptor internalization in cocultures, (f) T cells and CHO-WT (upper panel) or CHO-PD-L1<sup>+</sup> cells (lower panel) incubated with MCLA-145 Single plane view, magnification 20x (inset 63x); (g) 3D reconstruction of sequential confocal images of cells incubated with MCLA-145 and CHO-PD-L1<sup>+</sup> cells, nuclear (DAPI) staining (blue), CD8 (green), CD137 (magenta), actin (red) Single plane view, magnification 20x (insets 63x); (h) using segmentation analysis, mean intensity of CD137-AF647 objects were measured as a subset of the CD8-AF488 positive cells, images from 3 separate microscopy fields were taken with 20X magnification per sample; error bars are mean  $\pm$  SD statistical analysis was performed by Ordinary one-way Anova and Dunnett's test, \*\*\*  $p = 0.0003$ . Data is representative of two repeat experiments for figure 6f and 6g.

## SUPPLEMENTARY TABLES

Supplementary Table 1 | Characteristics of cLC antibodies binding PD-L1 and CD137

| FAB ID | Target       | Super cluster <sup>§</sup> | Bin <sup>#</sup> | Domain <sup>%</sup> | Agonistic mAb <sup>  </sup> | Ligand blockade (%) <sup>a</sup> |
|--------|--------------|----------------------------|------------------|---------------------|-----------------------------|----------------------------------|
| 001    | CD137        | 20                         | A                | 1/2                 | X                           | 44                               |
| 002    | CD137        | 20*                        | A                | 1/2                 | X                           | 6                                |
| 003    | CD137        | 4                          | A                | 1 or 2              | X                           | 26                               |
| 004    | CD137        | 3*                         | A                | 1 or 2              | -                           | -60                              |
| 005    | CD137        | 22*                        | B                | 1/2                 | -                           | 50                               |
| 006    | CD137        | 19*                        | B                | 1/2                 | -                           | 24                               |
| 007    | CD137        | 13*                        | B                | 1/2                 | -                           | -126                             |
| 008    | CD137        | 15*                        | C                | 4                   | -                           | 24                               |
| 009    | CD137        | 73                         | D                | ND                  | -                           | 77                               |
| 010    | CD137        | 68                         | D                | ND                  | -                           | 32                               |
| 011    | CD137        | 43                         | E                | 1                   | -                           | 44                               |
| 012    | CD137        | 10*                        | E                | 1                   | X                           | 8                                |
| 013    | CD137        | 72                         | E                | 1                   | -                           | 2                                |
| 014    | CD137        | 73*                        | E                | 1                   | -                           | -67                              |
| 015    | CD137        | 8*                         | E                | 1                   | -                           | -3                               |
| 016    | CD137        | 11                         | E                | 1                   | -                           | 100                              |
| 017    | CD137        | 51*                        | E                | 1                   | -                           | 32                               |
| 018    | CD137        | 57*                        | E                | 1                   | -                           | -76                              |
| 019    | <b>CD137</b> | <b>13</b>                  | <b>F</b>         | <b>2</b>            | -                           | <b>101</b>                       |
| 020    | <b>CD137</b> | <b>12</b>                  | <b>F</b>         | <b>2</b>            | -                           | <b>101</b>                       |
| 021    | CD137        | 50                         | F                | 2                   | X                           | 72                               |
| 022    | CD137        | 27                         | F                | 2                   | X                           | 99                               |
| 023    | CD137        | 15                         | F                | 2                   | -                           | 95                               |
| 024    | CD137        | 35                         | F                | 2                   | -                           | 96                               |
| 025    | CD137        | 52                         | F                | 2                   | -                           | 24                               |
| 026    | <b>CD137</b> | <b>49</b>                  | <b>G</b>         | <b>2/3</b>          | -                           | <b>99</b>                        |
| 027    | CD137        | 31                         | G                | 2                   | X                           | 89                               |
| 028    | CD137        | 19                         | G                | 2                   | X                           | 67                               |
| 029    | CD137        | 8                          | G                | 2 or 3              | X                           | 84                               |
| 030    | CD137        | 17                         | G                | 2 or 3              | -                           | 58                               |
| 031    | CD137        | 1                          | G                | 2 or 3              | -                           | -2                               |
| 032    | CD137        | 53                         | H                | 3                   | -                           | 81                               |

|     |              |           |           |            |           |            |
|-----|--------------|-----------|-----------|------------|-----------|------------|
| 033 | CD137        | 18        | H         | 3          | X         | 76         |
| 034 | CD137        | 39        | H         | 3          | X         | 20         |
| 035 | CD137        | 75*       | I         | 4          | -         | -16        |
| 036 | CD137        | 1*        | J         | ND         | -         | -22        |
| 037 | CD137        | 6*        | J         | ND         | X         | -80        |
| 038 | CD137        | 2*        | J         | ND         | X         | -76        |
| 039 | CD137        | 14*       | J         | ND         | -         | -97        |
| 040 | CD137        | 54*       | J         | ND         | -         | -43        |
| 041 | CD137        | 69*       | J         | ND         | -         | -105       |
| 042 | CD137        | 53*       | J         | ND         | -         | -64        |
| 043 | CD137        | 65*       | J         | ND         | -         | -101       |
| 044 | CD137        | 17*       | J         | ND         | -         | -71        |
| 045 | <b>CD137</b> | <b>6</b>  | <b>K</b>  | <b>1/2</b> | -         | <b>102</b> |
| 046 | CD137        | 63        | K         | 1/2        | X         | 55         |
| 047 | CD137        | 24*       | K         | 1/2        | -         | -100       |
| 048 | PD-L1        | 16        | NA        | NA         | NA        | 100        |
| 049 | PD-L1        | 13        | NA        | NA         | NA        | 100        |
| 050 | <b>PD-L1</b> | <b>78</b> | <b>NA</b> | <b>NA</b>  | <b>NA</b> | <b>100</b> |
| 051 | PD-L1        | 21        | NA        | NA         | NA        | 100        |
| 052 | PD-L1        | 2         | NA        | NA         | NA        | 0          |
| 053 | PD-L1        | 67        | NA        | NA         | NA        | 100        |
| 054 | PD-L1        | 66        | NA        | NA         | NA        | 100        |
| 055 | PD-L1        | 12        | NA        | NA         | NA        | 100        |
| 056 | PD-1         | 12        | NA        | NA         | NA        | 100        |
| 057 | PD-1         | 12        | NA        | NA         | NA        | 100        |
| 058 | PD-1         | 3         | NA        | NA         | NA        | 0          |

§ Supercluster, defined as VH sequences belonging to the same VH germ line gene based on cluster analysis, a HCDR3 (heavy chain complementarity determining region 3) of the same amino acid length and having 70% amino acid sequence identity in the HCDR3 region, each supercluster so defined is arbitrarily assigned a numerical ID; # Bin, arbitrary classification based on classes of binding profiles against chimeric CD137 constructs (note these were in some cases distributed over different domains); % Domain, CD137 domain to which antibody was mapped using mouse human swapped-domain constructs (1 or 2 means that the antibody could not be clearly mapped to one of the two domains); <sup>||</sup> Agonistic mAb, capacity of bivalent antibody to activate Jurkat-NFκB-luc-CD137; <sup>^</sup> Ligand blockade (%), capacity of Fab arm to block interaction with CD137L or

PD-1; most potent Fab arms in bispecific format indicated in bold; \* Indicates FAB superclusters that are derived from selections with synthetic libraries; NA, Not applicable; ND, Not done.

**Supplementary Table 2 | Summary of kinetic parameters determined by SPR for human PD-L1 and human CD137 binding to antibodies**

| Antibody                  | Target | Capture (RU#) | Rmax thr <sup>a</sup> | Rmax.exp | k <sub>a</sub> (1/Ms) | k <sub>d</sub> (1/s) | K <sub>D</sub> (nM) |
|---------------------------|--------|---------------|-----------------------|----------|-----------------------|----------------------|---------------------|
| MCLA-145                  | PD-L1  | 135           | 23                    | 21       | 3.059E+6              | 0.001551             | 0.51                |
| Parental mAb <sup>b</sup> | PD-L1  | 135           | 47                    | 46       | 2.084E+6              | 0.001389             | 0.67                |
| atezolizumab*             | PD-L1  | 146           | 51                    | 48       | 7.446E+5              | 4.372E-4             | 0.59                |
| avelumab*                 | PD-L1  | 164           | 57                    | 55       | 3.312E+5              | 3.592E-4             | 1.1                 |
| MCLA-145                  | CD137  | 115           | 14                    | 16       | 8.732E+5              | 0.001679             | 1.9                 |
| Parental mAb <sup>b</sup> | CD137  | 99            | 24                    | 27       | 1.038E+6              | 0.001121             | 1.1                 |
| utomilumab*               | CD137  | 100           | 24                    | 25       | 2.192E+6              | 0.01888              | 8.6                 |
| urelumab*                 | CD137  | 86            | 20                    | 21       | 6.515E+5              | 0.002993             | 4.6                 |

# Response Unit

<sup>a</sup> Theoretical Rmax (maximal response) calculated from capture level, MW, and stoichiometry

<sup>b</sup> Fab arm binding target from MCLA-145 reformatted as a bivalent IgG1 mAb

**Supplementary Table 3 | Details of cell affinity measurements for radiolabeled MCLA-145**

| Cell Line | Ligand                    | Assay # | K <sub>D</sub> (nM) | 95% CI <sup>#</sup> (nM) | R <sup>2</sup> | # of Cells |
|-----------|---------------------------|---------|---------------------|--------------------------|----------------|------------|
| CHO-PD-L1 | <sup>125</sup> I-MCLA-145 | 1       | 0.48                | 0.26 to 0.70             | 0.97           | 4,000      |
| CHO-PD-L1 | <sup>125</sup> I-MCLA-145 | 2       | 0.46                | 0.24 to 0.69             | 0.98           | 4,000      |
| CHO-PD-L1 | <sup>125</sup> I-MCLA-145 | 3       | 0.52                | 0.21 to 0.83             | 0.99           | 4,000      |
|           | <i>Mean ± SD</i>          |         | <i>0.49 ± 0.030</i> |                          |                |            |
| CHO-CD137 | <sup>125</sup> I-MCLA-145 | 1       | 2.05                | 0 to 5.35                | 0.87           | 16,000     |
| CHO-CD137 | <sup>125</sup> I-MCLA-145 | 2       | 2.00                | 1.03 to 2.98             | 0.96           | 16,000     |
| CHO-CD137 | <sup>125</sup> I-MCLA-145 | 3       | 2.02                | 0.28 to 3.75             | 0.98           | 16,000     |
|           | <i>Mean ± SD</i>          |         | <i>2.02 ± 0.022</i> |                          |                |            |

# Confidence interval



**Supplementary Table 4 | Antibody information**

| Antibody                                                          | Catalogue number | Lot number  | Dilution | Use      |
|-------------------------------------------------------------------|------------------|-------------|----------|----------|
| anti-huCD3 OKT3                                                   | 16-0037-85       | 4303589     | 1: 4000  | Assay    |
| anti-huPD-L1 MIH1                                                 | 14-5983-82       | E04651-1630 | 1:500    | FACS     |
| anti-huCD137 M127                                                 | 552532           | 7054673     | 1:500    | Vera Tag |
| anti-huCD137 BBK2                                                 | MS-621           | SI2448351L  | 1:200    | Vera Tag |
| mouse IgG1, k isotype control antibody MOPC-21                    | 401408           | B189676     | 1:100    | Vera Tag |
| anti-huPD-L1 E1L3N                                                | 1368             |             | 1: 200   | Vera Tag |
| rabbit control antibody Rabbit (DA1E) mAb IgG XP® Isotype Control |                  |             | 1:2500   | Vera Tag |
| biotin-conjugated anti-huCD137L BAF2295                           |                  | UQI0116071  | 1:50     | FACS     |
| FITC anti-huCD8HIT8a                                              | 555634           | 524298      | 1:60     | FACS     |
| anti-huCD45ROUCLH1                                                | 555493           | 6320585     | 1:100    | FACS     |
| APC-H7 anti-huCD45RAHI100                                         | 560674           | 7047723     | 1:50     | FACS     |
| APC/Fire™ 750 anti-huCD62LDREG-56                                 | 304846           | B222694     | 1:100    | FACS     |
| PE anti-huCCR7150503                                              | FAB197P          | LEV1415041  | 1:100    | FACS     |
| PE anti-huCD57TB01                                                | 12-0577-42       | 4292328     | 1:100    | FACS     |
| APC-H7 anti-huCD28CD28.2                                          | 561368           | 3031774     | 1:50     | FACS     |
| PE anti-huCD27M-T271                                              | 555441           | 7087984     | 1:100    | FACS     |
| AF488 anti-huCD56B159                                             | 561905           | 6057866     | 1:60     | FACS     |
| APC-H7 anti-huCD3SK7                                              | 560176           | 5255854     | 1:60     | FACS     |
| anti-huCD8SK1                                                     | 345784           | 5335947     | 1:100    | FACS     |
| anti-huCD137 4B4-1                                                | 555955           |             | 1:100    | FACS     |
| anti-huPD-L1 130021                                               | 1561             |             | 1:100    | FACS     |
| anti-huCD3 OKT3                                                   | 317315           |             | 1:1000   | FACS     |
| anti-huCD28 28.2                                                  | 302923           |             | 1:1000   | FACS     |
| BV421 anti-huCD5UCHT2                                             | 562646           | 6049748     | 1:20     | FACS     |
| PerCP/Cy5.5 anti-huCD4 RPA-T4                                     | 560650           | 6209689     | 1:60     | FACS     |
| PerCP/Cy5.5 anti-huCD20 2H7                                       | 560736           | 6105587     | 1:20     | FACS     |
| APC-H7 anti-huCD19HIB19                                           | 560727           | 5281893     | 1:20     | FACS     |
| PerCP/Cy5.5 anti-huCD16 3G8                                       | 560717           | 6168980     | 1:60     | FACS     |
| APC-H7 anti-huCD14MΦP9                                            | 560180           | 526191      | 1:60     | FACS     |
| FITC anti-huCD11cB-ly6                                            | 561355           | 5128648     | 1:60     | FACS     |
| PerCP/Cy5.5 anti-                                                 | 560904           | 6070695     | 1:20     | FACS     |

|                                                      |             |         |       |                                |
|------------------------------------------------------|-------------|---------|-------|--------------------------------|
| huCD1237G3                                           |             |         |       |                                |
| PE anti-huPD-L1MIH1                                  | 557924      | 5295791 | 1:20  | FACS                           |
| PE Mouse IgG1, k isotype control antibody MOPC-21    | 556650      | 3042677 | 1:60  | FACS                           |
| BV421 anti-HLA-DRG46-6                               | 562805      | 6077504 | 1:20  | FACS                           |
| APC anti-huCD1374B4-1                                | 550890      | 5225539 | 1:20  | FACS                           |
| APC Mouse IgG1, k isotype control antibody MOPC-21   | 400122      | B210935 | 1:20  | FACS                           |
| AF647 anti-huCD1374B4-1                              | 309823      |         | 1:50  | Confocal imaging               |
| AF488 anti-huCD8 RPA-T8                              | 557696      |         | 1:100 | Confocal imaging               |
| human IgG4 isotype control antibody QA16A15          | 94242       | 8261576 | 1:100 | FACS                           |
| BV510 anti-huCD226 11A8                              | 338330      | B259831 | 1:40  | FACS                           |
| Super Bright 436 anti-ICOS ISA-3                     | 62-9948-42  | 432838  | 1:160 | FACS                           |
| PE anti-CTLA-4 BNI3                                  | 555853      | 7208849 | 1:40  | FACS                           |
| BV605 anti-CD137 4b4-1                               | 745256      | 8292716 | 1:40  | FACS                           |
| AF647 anti-OX40 ACT35                                | 350018      | B245379 | 1:160 | FACS                           |
| PerCP Cyanine5.5 anti-Lag-3 11C3C65                  | 369312      | B254045 | 1:80  | FACS                           |
| BV650 anti-Tim-3 7D3                                 | 565564      | 8120836 | 1:80  | FACS                           |
| AF488 anti-IL-10 JES3-9D7                            | 501413      | B189479 | 1: 10 | FACS                           |
| BV786 anti-GITR V27-580                              | 747661      | 8292722 | 1:40  | FACS                           |
| APC-R700 anti huPD-L1 MIH1                           | 565188      | 8092804 | 1:400 | FACS                           |
| BUV737 anti-huCD3 UCHT1                              | 564307      | 8101534 | 1:20  | FACS                           |
| APC-Cy7 anti-huCD8 SK1                               | 557834      | 8184768 | 1:20  | FACS                           |
| PE-Cy7 anti-huCD4 SK3                                | 557852      | 8317967 | 1:20  | FACS                           |
| AF647 anti-huCCR7 3D12                               | 557734      | 8194595 | 1:20  | FACS                           |
| BUV737 anti-huCD11b M1/70                            | 564443      | 7338572 | 1:20  | FACS                           |
| PE anti-huPD-L129E.2A3                               | 329706      | B262098 | 1:20  | FACS                           |
| BV 711™ anti-hu CD45RAHI100                          | 304138      | B250615 | 1:20  | FACS                           |
| FITC anti-huCD45 HI30                                | 555483      |         | 1:20  | FACS                           |
| anti-Vβ13.1 TCR chain REA560                         | 130-108-742 |         | 1:20  | FACS                           |
| anti-huCD137 monoclonal antibody (utumilumab analog) |             |         |       | FACS, in vitro /in vivo assays |
| anti-huCD137 monoclonal                              |             |         |       | FACS, in vitro                 |

|                                                       |  |  |  |                                   |
|-------------------------------------------------------|--|--|--|-----------------------------------|
| antibody (urelumab analog)                            |  |  |  | /in vivo assays                   |
| anti-huPDL1 monoclonal antibody (atezolizumab analog) |  |  |  | FACS, in vitro<br>/in vivo assays |
| anti-huPDL1 monoclonal antibody (atezolizumab)        |  |  |  | FACS, in vitro<br>/in vivo assays |
| anti-huPD-1 monoclonal (pembrolizumab)                |  |  |  | FACS, in vitro<br>/in vivo assays |
